# Supplementary material for: A trial proteomics fingerprint analysis of HepaRG cells by FD-LC-MS/MS
Source: Royal Society of Chemistry journal article supplement (doi:10.1039/c4an01434k), 2014-11-10
Supplement: c4an01434k1.pdf [file c4an01434k1.pdf]

## Supplementary Information

### A trial proteomics fingerprint analysis of HepaRG cells by FD-LC-MS/MS

Katsunori Nakata<sup>a,b</sup>, Tomoko Ichibangase<sup>a</sup>, Ryoichi Saitoh<sup>b</sup>, Masaki Ishigai<sup>b</sup>, Kazuhiro Imai<sup>a\*</sup>

<sup>a</sup> Laboratory of Proteomics Analysis, Research Institute of Pharmaceutical Sciences, Musashino University, 1-1-20 Shinmachi, Nishitokyo-shi, Tokyo 202-8585, Japan

<sup>b</sup> Research Division, Chugai Pharmaceutical Co., Ltd., 1-135 Komakado, Gotemba, Shizuoka 412-8513, Japan

\*Correspondence to: K. Imai, E-mail address: k-imai@musashino-u.ac.jp; Fax: +81-42-468-9787; Tel: +81-42-468-9787

## **Experimental**

### Preparation of HepaRG cell lysates

Frozen HepaRG cells were purchased from Biopredic International (Rennes, France). To prepare HepaRG cell lysates, the frozen cells ( $12 \times 10^6$  cells) were thawed and centrifuged. The pelleted cells were suspended in 1,200  $\mu\text{L}$  of cell lysis buffer (phosphate buffered saline, 0.50% Triton X-114, Halt Protease Inhibitor Cocktail (Pierce, Waltham, MA, USA), and incubated at  $4.0^\circ\text{C}$  for 1.0 h. The cells were homogenized by homogenizer (I.S.O. Inc., Kanagawa, Japan), left on ice for 30 min and then centrifuged at 13,000g for 15 min at  $4.0^\circ\text{C}$ . The supernatant was recovered. Total protein concentration was measured by BCA protein assay kit (Pierce) using bovine serum albumin (BSA) as a standard.

### Conditions for FD-LC-MS/MS method

HepaRG protein lysate (40  $\mu\text{g}/35 \mu\text{L}$ ) was mixed with 40  $\mu\text{L}$  of a mixture of 1.25 mM Tris (2-carboxyethyl) phosphine hydrochloride (TCEP) and 5.0 mM ethylenediamine-N, N, N', N'-tetraacetic acid sodium salt ( $\text{Na}_2\text{EDTA}$ ) in pH 8.7 guanidine buffer solution; 20  $\mu\text{L}$  of 2.5% Triton X-114 in pH 8.7 guanidine buffer solution; and 5.0  $\mu\text{L}$  of 140 mM DAABD-Cl (Tokyo Chemical Industry, Tokyo, Japan) in acetonitrile. After the reaction mixture had been placed in a  $40^\circ\text{C}$  water bath for 10 min, 3.0  $\mu\text{L}$  of 20% trifluoroacetic acid (TFA) was added to stop the derivatization reaction. Twenty microliters (equivalent to 8.0  $\mu\text{g}$  protein) of the reaction mixture was injected into the LC system. The LC system consisted of a pump (L-2130; Hitachi, Tokyo, Japan), a column oven (L-2350; Hitachi), and a fluorescence detector (L-2485; Hitachi). For the stationary phase to separate the derivatized proteins, we used columns of core

shell materials (WIDEPORÉ XB-C8, 250 x 4.6 mm i.d., 3.6  $\mu\text{m}$  particle, Phenomenex, USA), either singly or as 3 connected columns with a column temperature of 30°C, 40°C, 50°C, 60°C, or 70°C. The excitation and emission wavelengths for detecting fluorescence were modified from those previously adopted and were set at 395 nm and 505 nm, respectively. The flow cell volume was 3.0  $\mu\text{L}$ . The gradient program for a single column was as follows: 0 $\rightarrow$ 5 $\rightarrow$ 20 $\rightarrow$ 25 $\rightarrow$ 40 $\rightarrow$ 120 $\rightarrow$ 450 $\rightarrow$ 510 $\rightarrow$ 585 $\rightarrow$ 600 min; B 0 $\rightarrow$ 0 $\rightarrow$ 30 $\rightarrow$ 30 $\rightarrow$ 30 $\rightarrow$ 40 $\rightarrow$ 60 $\rightarrow$ 70 $\rightarrow$ 100 $\rightarrow$ 100% ((A) acetonitrile:isopropanol:water:TFA=9.0:1.0:90:0.10, v/v/v/v; (B) acetonitrile:isopropanol:water:TFA=74:1.0:25:0.10, v/v/v/v). The flow rates were gradually changed from 0.10 to 0.60 mL/min. The gradient program for the three connected columns was similar to that for a single column except that the flow rate was changed to 0.40 $\rightarrow$ 0.40 $\rightarrow$ 0.40 $\rightarrow$ 0.20 mL/min and temperature was set to 60°C. The HPLC chromatograms were obtained by Hitachi EZChrom software (v. 3.1.7J).

#### Identification of the proteins

Each protein peak eluted from the column(s) (a single one, or the 3 connected) was concentrated to 5.0  $\mu\text{L}$  under reduced pressure. The residual material was diluted with 50  $\mu\text{L}$  of a 250 mM ammonium bicarbonate solution (pH 7.8) containing 0.50 U trypsin (Promega, Madison, WI, USA) and 10 mM calcium chloride, and the resultant mixture was incubated for 2.0 h at 37°C. The solution was subsequently concentrated to 20  $\mu\text{L}$ . The peptide mixture (6.0  $\mu\text{L}$ ) was directly injected into a nano-LC-ESI-MS/MS system (UltiMate 3000, LTQ Orbitrap XL Thermo Fisher Scientific, Waltham, MA, USA), which combines a hybrid FT mass spectrometer with a linear ion trap MS and an Orbitrap mass

analyzer. Peptides were loaded on a pre column (LC Packings, CA, USA; phase: C18PM), followed by elution and separation on the spray tip column (3.0  $\mu\text{m}$  particle, 75  $\mu\text{m}$  i.d.  $\times$  100 mm, Nikkyo Technos, Tokyo, Japan) at a flow rate of 0.30  $\mu\text{L}/\text{min}$ , employing a gradient from 0% to 40% for buffer B (0.10% formic acid in 80% acetonitrile) over a period of 35 min (buffer A: 0.10% formic acid in 2.0% acetonitrile). Peptides were eluted into the MS via a spray tip column, which was used with a spray voltage ranging from 1000 to 2000 V, depending on the state of the tip column, and the transfer tube temperature was set at 200°C. Data-dependent acquisition was controlled by the Tune Plus software (Thermo Fisher Scientific, Waltham, MA, USA). For database searching, the Mascot version 2.3.01 program was used and the data were searched against the IPI human database (version 3.74, 89,575 proteins). The variable modification was set as DAABD for cysteine residues. The peptide tolerance was set at 5.0ppm and the MS/MS tolerance was set at 0.70Da. Under these conditions, Mascot scores of more than 21 were given.

Protein identification corresponding to each peak was performed as described previously<sup>1,2</sup>; the protein name with the significantly largest score was assigned to the corresponding peak. The protein name(s) for the second or the third largest score(s) numbers but similar to those for the first assigned protein was (were) assigned to the same peak, since the peak might have overlapped on account of low efficient separation under the present HPLC conditions. The protein names derived from obviously recognizable contaminants, such as keratin, as well as those without cysteine residues were deleted. If the peak shape was not asymmetrical, the protein name(s) for the second or the third largest score(s) numbers was (were) added to the list, in addition to the protein name for the first largest score number.

Bioinformatics analysis of identified proteins

Protein annotations were obtained from DAVID (<http://david.abcc.ncifcrf.gov/>) as Gene Ontology (GO).<sup>3</sup>

## References

1. K. Nakata, R. Saitoh, J. Amano, A. Koshiyama, T. Ichibangase, N. Murao, K. Ohta, Y. Aso, M. Ishigai, and K. Imai, *Cytokine*, 2012, **59**, 317–23.
2. K. Nakata, R. Saitoh, J. Amano, T. Ichibangase, M. Ishigai, and K. Imai, *Biomed. Chromatogr.*, 2014, **28**, 742-750.
3. D. W. Huang, B. T. Sherman, and R. A. Lempicki, *Nat. Protoc.*, 2009, **4**, 44–57.

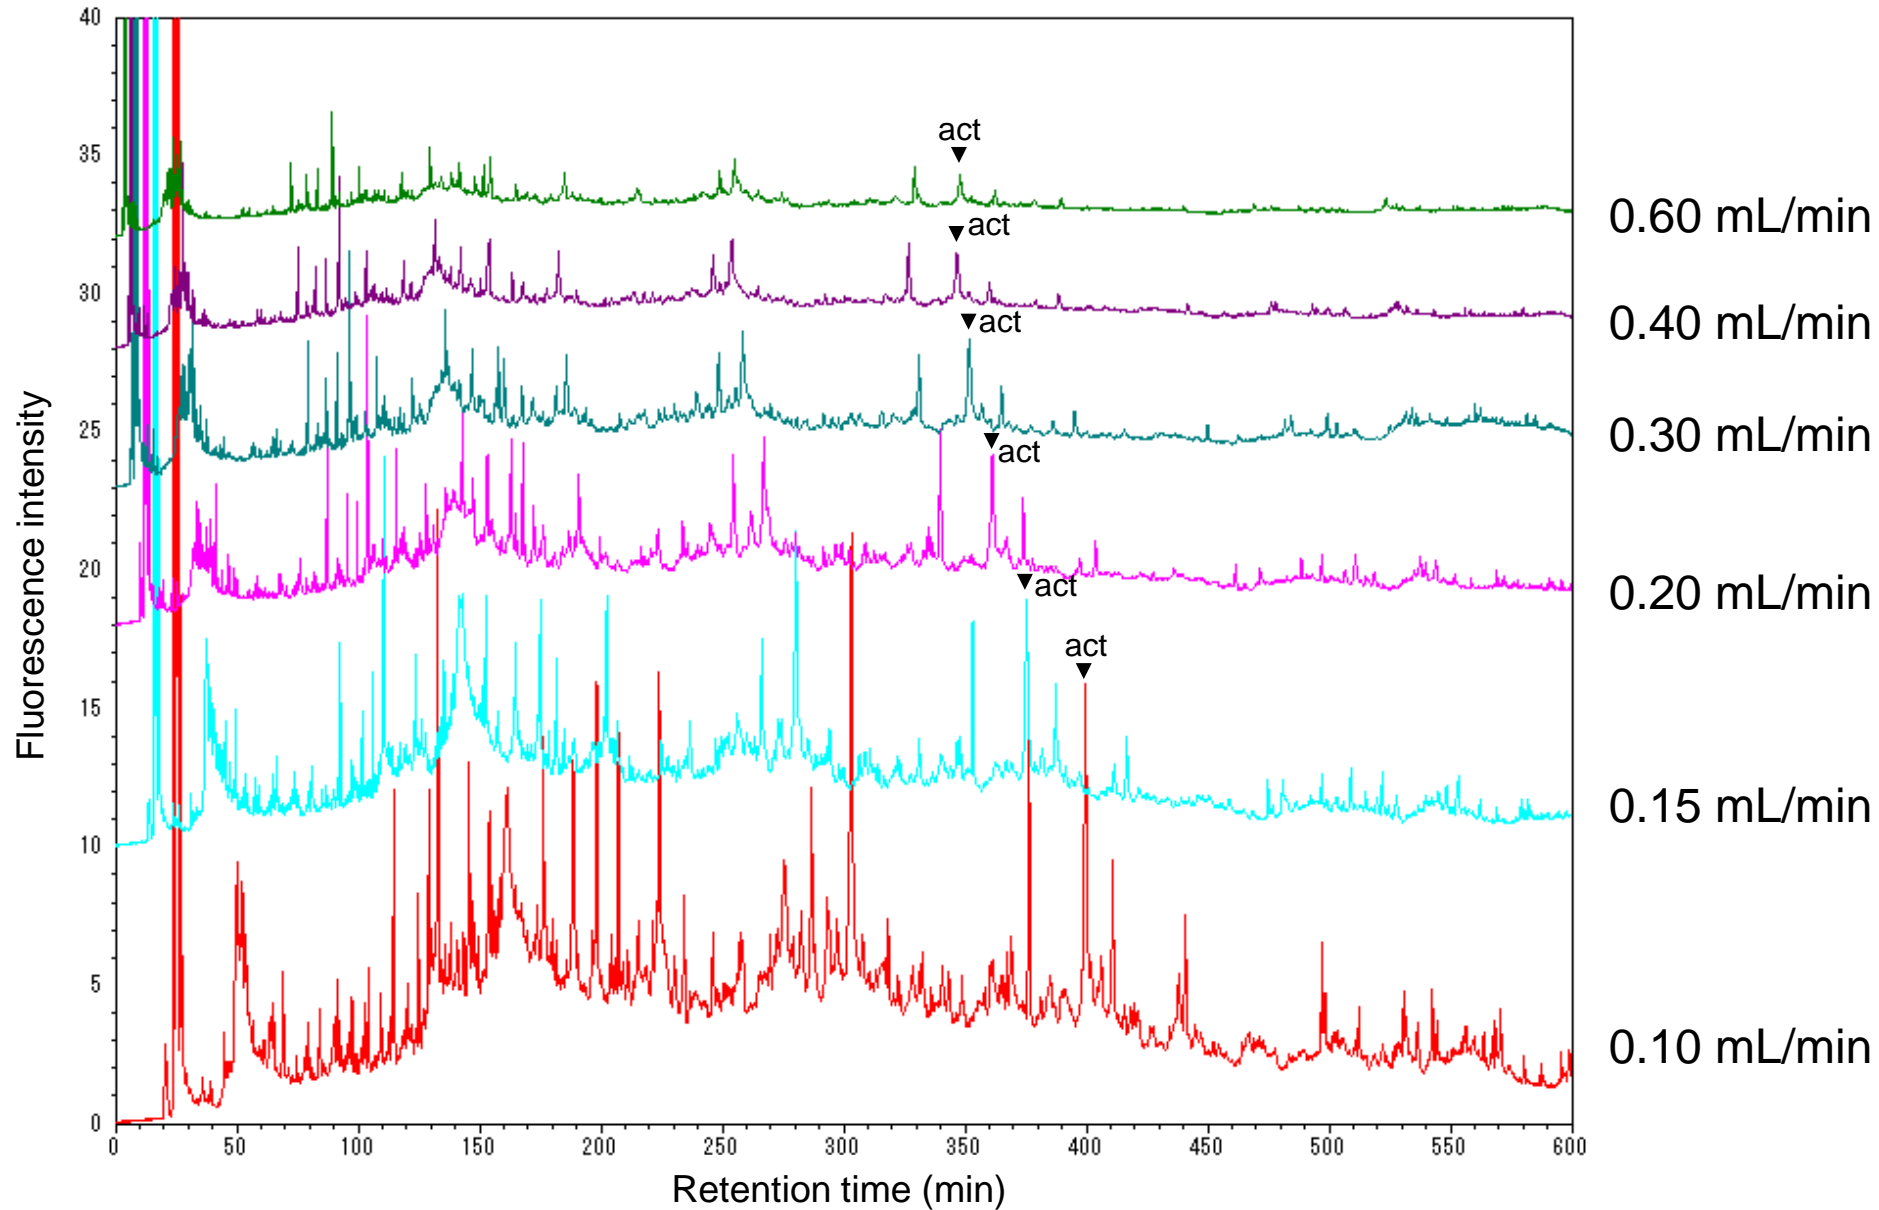

Supplementary Figure 1. Chromatograms of the protein mixtures (8.0 ug protein/ injection) obtained from the HepaRG extract at flow rates of 0.10, 0.15, 0.20, 0.30, 0.40, and 0.60 mL/min at a column temperature of 60°C. Arrowheads indicate peaks identified as actin.

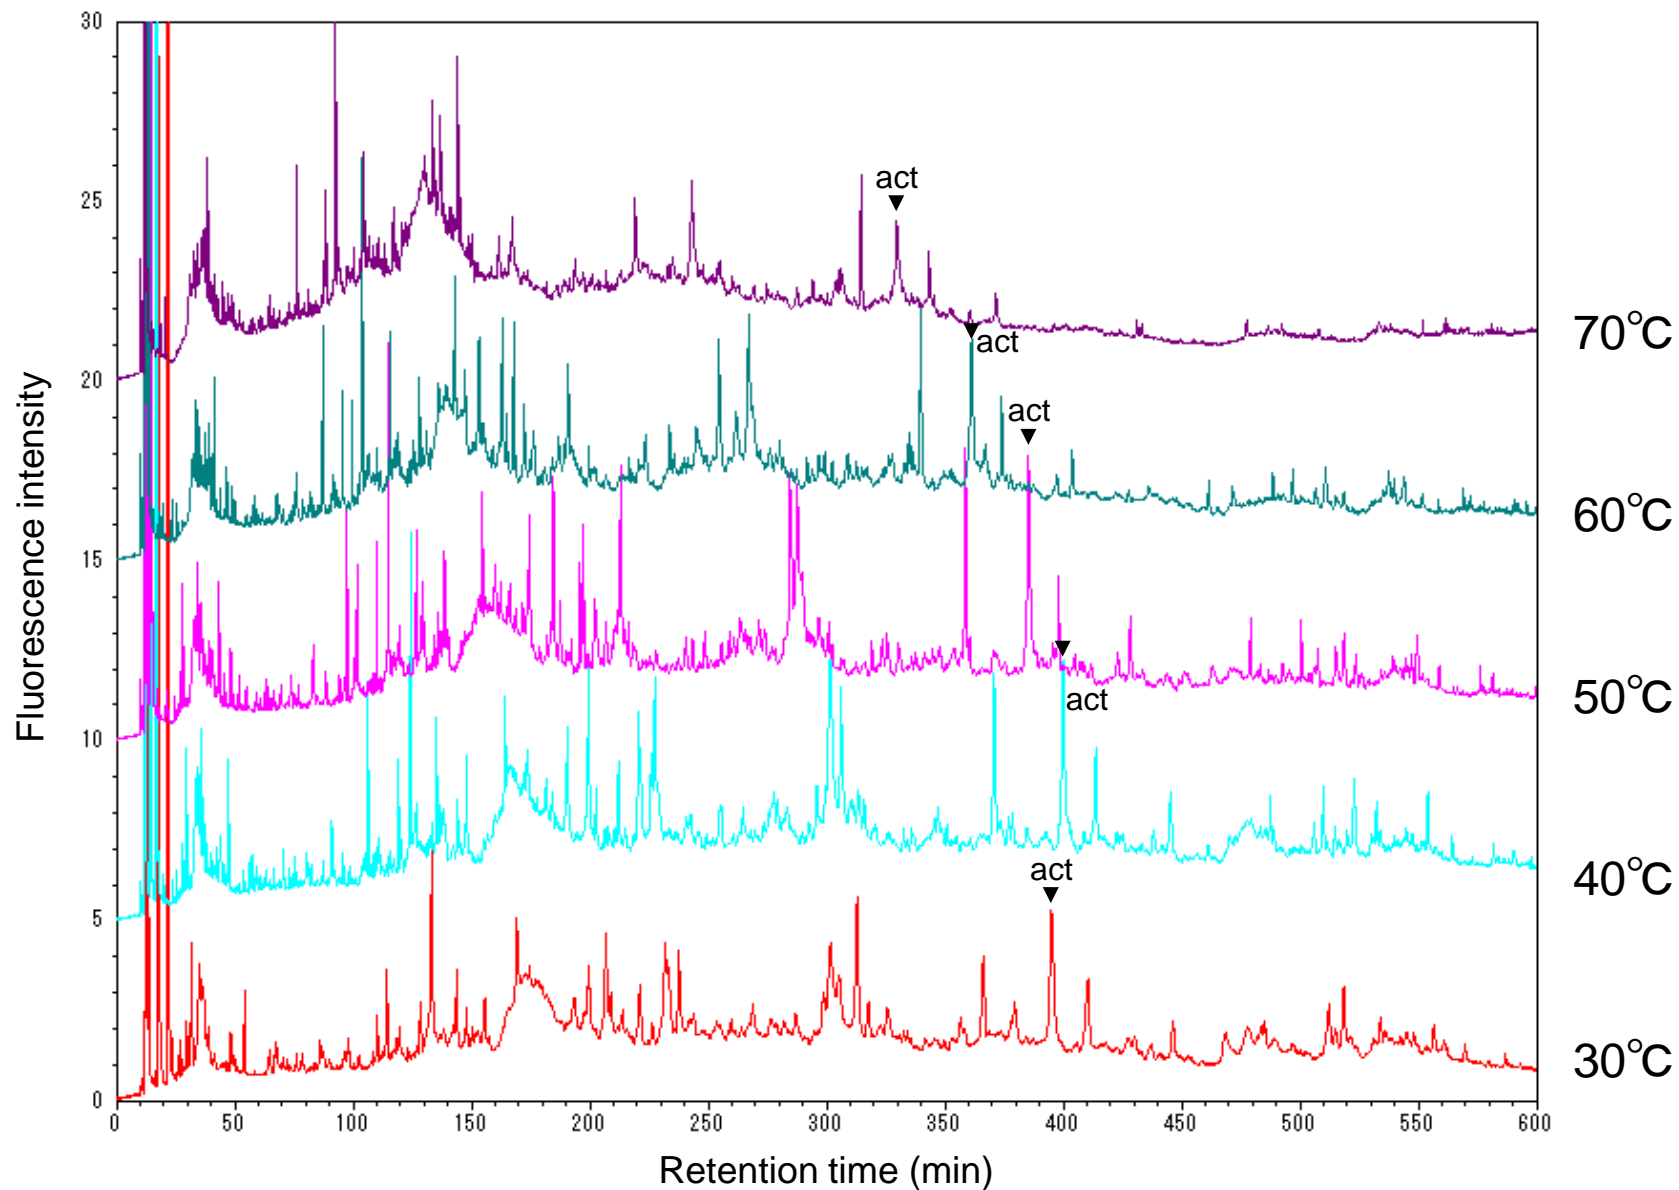

Supplementary Figure 2. Chromatograms of the protein mixtures (8.0 ug protein/ injection) obtained from the HepaRG extract at column temperatures of 30°C, 40°C, 50°C, 60°C, and 70°C mL/min and at a flow rate of 0.20 mL/min. Arrowheads indicate peaks identified as actin.

Supplementary Table 1. List of HepaRG proteins identified by the FD-LC-MS/MS method

| Accession No. | Gene symbol | Protein name                                      | Score | Mass (Da) | Peptides | Mitochondrion | Endoplasmic reticulum | Cytoskeleton | Ribosome | Nucleolus | Cytosol | hepatocyte specific | HepaRG 2D-PAGE (Narayana, 2008) | HepaRG Shotgun (Sokolowska, 2012) | HepaRG Shotgun (Petreanu, 2013) |
|---------------|-------------|---------------------------------------------------|-------|-----------|----------|---------------|-----------------------|--------------|----------|-----------|---------|---------------------|---------------------------------|-----------------------------------|---------------------------------|
| IPI00296635   | GBE1        | 1,4-alpha-glucan-branching enzyme                 | 261   | 80409     | 17       |               |                       |              |          |           | x       |                     |                                 |                                   |                                 |
| IPI00220362   | HSPE1       | 10 kDa heat shock protein, mitochondrial          | 104   | 10925     | 2        | x             |                       |              |          |           |         |                     |                                 |                                   |                                 |
| IPI00290553   | ALDH1L1     | 10-formyltetrahydrofolate dehydrogenase           | 738   | 98767     | 49       |               |                       |              |          |           |         | x                   |                                 |                                   |                                 |
| IPI00216318   | YWHAB       | 14-3-3 protein beta/alpha                         | 337   | 28065     | 15       |               |                       |              |          |           | x       |                     | x                               | x                                 |                                 |
| IPI00000816   | YWHAE       | 14-3-3 protein epsilon                            | 192   | 29155     | 10       | x             |                       |              |          |           | x       |                     |                                 | x                                 |                                 |
| IPI00021263   | YWHAZ       | 14-3-3 protein zeta/delta                         | 395   | 27728     | 20       | x             |                       | x            |          |           |         |                     | x                               | x                                 |                                 |
| IPI00003482   | DECR1       | 2,4-dienoyl-CoA reductase, mitochondrial          | 172   | 36045     | 10       | x             |                       |              |          |           |         |                     |                                 |                                   | x                               |
| IPI00016703   | DHCR24      | 24-dehydrocholesterol reductase                   | 117   | 60062     | 6        |               | x                     |              |          |           |         |                     |                                 |                                   |                                 |
| IPI00023919   | PSMC5       | 26S protease regulatory subunit 8                 | 343   | 45597     | 20       |               |                       |              |          | x         |         |                     |                                 |                                   |                                 |
| IPI00011603   | PSMD3       | 26S proteasome non-ATPase regulatory subunit 3    | 248   | 60939     | 17       |               |                       |              |          |           | x       |                     |                                 |                                   |                                 |
| IPI00019927   | PSMD7       | 26S proteasome non-ATPase regulatory subunit 7    | 283   | 37002     | 11       |               |                       |              |          |           |         |                     |                                 |                                   |                                 |
| IPI00017726   | HSD17B10    | 3-hydroxyacyl-CoA dehydrogenase type-2            | 756   | 26906     | 25       | x             | x                     |              |          |           |         |                     |                                 |                                   |                                 |
| IPI00001539   | ACAA2       | 3-ketoacyl-CoA thiolase, mitochondrial            | 183   | 41898     | 12       | x             |                       |              |          |           |         |                     |                                 |                                   |                                 |
| IPI00012828   | ACAA1       | 3-ketoacyl-CoA thiolase, peroxisomal              | 271   | 44264     | 13       |               |                       |              |          |           |         |                     |                                 |                                   |                                 |
| IPI00221092   | RPS16       | 40S ribosomal protein S16                         | 283   | 16435     | 15       |               |                       |              | x        |           | x       |                     |                                 |                                   | x                               |
| IPI00017448   | RPS21       | 40S ribosomal protein S21                         | 301   | 9106      | 24       |               |                       |              | x        |           | x       |                     |                                 |                                   |                                 |
| IPI00011253   | RPS3        | 40S ribosomal protein S3                          | 462   | 26671     | 26       |               |                       |              | x        |           | x       |                     |                                 |                                   |                                 |
| IPI00021840   | RPS6        | 40S ribosomal protein S6                          | 109   | 28663     | 8        |               |                       |              | x        |           | x       |                     |                                 |                                   |                                 |
| IPI00216587   | RPS8        | 40S ribosomal protein S8                          | 392   | 24190     | 16       |               |                       |              | x        |           | x       |                     |                                 |                                   | x                               |
| IPI00413108   | RPSA        | 40S ribosomal protein SA                          | 266   | 33293     | 9        |               |                       |              | x        |           | x       |                     |                                 |                                   |                                 |
| IPI00784154   | HSPD1       | 60 kDa heat shock protein, mitochondrial          | 694   | 61016     | 25       | x             |                       |              |          |           |         |                     |                                 |                                   | x                               |
| IPI00024933   | RPL12       | 60S ribosomal protein L12                         | 378   | 17808     | 11       |               |                       |              | x        |           | x       |                     |                                 |                                   | x                               |
| IPI00465361   | RPL13       | 60S ribosomal protein L13                         | 157   | 24247     | 7        |               |                       |              | x        |           | x       |                     |                                 |                                   | x                               |
| IPI00419919   | RPL29       | 60S ribosomal protein L29                         | 96    | 17741     | 5        |               |                       |              | x        |           | x       |                     |                                 |                                   |                                 |
| IPI00215790   | RPL38       | 60S ribosomal protein L38                         | 230   | 8213      | 9        |               |                       |              | x        |           | x       |                     |                                 |                                   |                                 |
| IPI00003918   | RPL4        | 60S ribosomal protein L4                          | 257   | 47667     | 11       |               |                       |              | x        |           | x       |                     |                                 |                                   | x                               |
| IPI00790342   | RPL6        | 60S ribosomal protein L6                          | 402   | 32871     | 34       |               |                       |              | x        |           | x       |                     |                                 |                                   |                                 |
| IPI00299573   | RPL7A       | 60S ribosomal protein L7a                         | 407   | 29977     | 22       |               |                       |              | x        |           | x       |                     |                                 |                                   | x                               |
| IPI00012772   | RPL8        | 60S ribosomal protein L8                          | 108   | 28007     | 6        |               |                       |              | x        |           | x       |                     |                                 |                                   | x                               |
| IPI00031691   | RPL9        | 60S ribosomal protein L9                          | 231   | 21850     | 15       |               |                       |              | x        |           | x       |                     |                                 |                                   | x                               |
| IPI00219525   | PGD         | 6-phosphogluconate dehydrogenase, decarboxylating | 238   | 53106     | 12       |               |                       |              |          |           |         |                     | x                               |                                   | x                               |
| IPI00030363   | ACAT1       | Acetyl-CoA acetyltransferase, mitochondrial       | 301   | 45171     | 12       | x             |                       |              |          |           |         |                     |                                 |                                   |                                 |
| IPI00017855   | ACO2        | Aconitate hydratase, mitochondrial                | 433   | 85372     | 27       | x             |                       |              |          |           |         |                     |                                 |                                   |                                 |
| IPI00021439   | ACTB        | Actin, cytoplasmic 1                              | 308   | 41710     | 19       |               |                       | x            |          |           | x       |                     | x                               | x                                 |                                 |
| IPI00028031   | ACADVL      | Acyl-CoA dehydrogenase, mitochondrial             | 366   | 75162     | 16       | x             |                       |              |          |           |         |                     |                                 |                                   |                                 |
| IPI00644771   | ACSM2A      | Acyl-coenzyme A synthetase ACSM2A, mitochondrial  | 156   | 64182     | 10       | x             |                       |              |          |           |         |                     |                                 |                                   |                                 |
| IPI00329444   | ACSM2B      | Acyl-coenzyme A synthetase ACSM2B, mitochondrial  | 445   | 64230     | 18       | x             |                       |              |          |           |         | x                   |                                 |                                   |                                 |
| IPI00215914   | ARF1        | ADP-ribosylation factor 1                         | 178   | 20684     | 7        |               |                       |              |          |           | x       |                     |                                 | x                                 | x                               |
| IPI00473031   | ADH1B       | Alcohol dehydrogenase 1B                          | 394   | 39829     | 24       |               |                       |              |          |           | x       |                     |                                 |                                   |                                 |
| IPI00296183   | ALDH3A1     | Aldehyde dehydrogenase, dimeric NADP-preferring   | 154   | 50347     | 21       |               | x                     |              |          |           | x       |                     |                                 |                                   | x                               |
| IPI00006663   | ALDH2       | Aldehyde dehydrogenase, mitochondrial             | 223   | 56346     | 13       | x             |                       |              |          |           |         |                     | x                               | x                                 |                                 |
| IPI00029715   | AOX1        | Aldehyde oxidase                                  | 358   | 147822    | 31       |               |                       |              |          |           |         |                     |                                 |                                   |                                 |
| IPI00105407   | AKR1B10     | Aldo-keto reductase family 1 member B10           | 344   | 35998     | 19       |               |                       |              |          |           |         |                     |                                 |                                   |                                 |
| IPI00291483   | AKR1C3      | Aldo-keto reductase family 1 member C3            | 500   | 36821     | 19       |               |                       |              |          |           |         |                     |                                 |                                   |                                 |
| IPI00013808   | ACTN4       | Alpha-actinin-4                                   | 268   | 104788    | 17       |               |                       | x            |          | x         |         |                     |                                 |                                   | x                               |
| IPI00221234   | ALDH7A1     | Alpha-aminoadipic semialdehyde dehydrogenase      | 321   | 58450     | 22       | x             |                       |              |          |           |         |                     |                                 |                                   |                                 |
| IPI00465248   | ENO1        | Alpha-enolase                                     | 351   | 47139     | 23       |               |                       |              |          |           | x       |                     |                                 | x                                 | x                               |
| IPI00008483   | MAOA        | Amine oxidase [flavin-containing] A               | 503   | 59644     | 28       | x             |                       |              |          |           |         |                     |                                 |                                   |                                 |
| IPI00218918   | ANXA1       | Annexin A1                                        | 101   | 38690     | 5        |               |                       | x            |          |           |         | x                   | x                               | x                                 |                                 |
| IPI00418169   | ANXA2       | Annexin A2                                        | 143   | 40386     | 8        |               |                       |              |          |           |         | x                   | x                               | x                                 |                                 |
| IPI00793199   | ANXA4       | Annexin A4                                        | 329   | 36062     | 13       |               |                       |              |          |           |         |                     |                                 |                                   |                                 |
| IPI00329801   | ANXA5       | Annexin A5                                        | 105   | 35914     | 6        |               |                       |              |          |           |         |                     | x                               | x                                 |                                 |
| IPI00002459   | ANXA6       | Annexin A6 isoform 2                              | 488   | 75229     | 26       |               |                       |              |          |           |         |                     |                                 |                                   |                                 |
| IPI00220007   | APOL2       | Apolipoprotein-L2                                 | 141   | 49735     | 5        |               |                       |              |          |           |         | x                   |                                 |                                   |                                 |
| IPI00554742   | API5        | Apoptosis inhibitor 5                             | 121   | 56735     | 4        |               |                       |              |          |           |         |                     |                                 |                                   |                                 |
| IPI00038356   | ARG1        | Arginase-1                                        | 38    | 25340     | 1        |               |                       |              |          |           |         | x                   |                                 |                                   |                                 |
| IPI00220267   | ASL         | Argininosuccinate lyase                           | 279   | 51625     | 18       |               |                       |              |          |           |         |                     |                                 |                                   |                                 |
| IPI00219029   | GOT1        | Aspartate aminotransferase, cytoplasmic           | 390   | 46219     | 19       |               |                       |              |          |           | x       |                     |                                 |                                   | x                               |
| IPI00550523   | ATL3        | Atlastin-3                                        | 118   | 60503     | 8        |               | x                     |              |          |           |         |                     |                                 |                                   |                                 |
| IPI00440493   | ATP5A1      | ATP synthase subunit alpha, mitochondrial         | 275   | 59714     | 13       | x             |                       |              |          |           |         | x                   |                                 |                                   | x                               |
| IPI00029133   | ATP5F1      | ATP synthase subunit b, mitochondrial             | 400   | 28890     | 26       | x             |                       |              |          |           |         | x                   | x                               | x                                 | x                               |









Supplementary Table 2. List of HepaRG proteins identified by the FD-LC-MS/MS method but not by 2D-PAGE or Shotgun proteomics

| Accession No. | Gene symbol | Protein name                                                                   | Score | Mass (Da) | Peptides | Cellular localization |
|---------------|-------------|--------------------------------------------------------------------------------|-------|-----------|----------|-----------------------|
| IPI00296635   | GBE1        | 1,4-alpha-glucan-branching enzyme                                              | 261   | 80409     | 17       | C                     |
| IPI00220362   | HSPE1       | 10 kDa heat shock protein, mitochondrial                                       | 104   | 10925     | 2        | M                     |
| IPI00016703   | DHCR24      | 24-dehydrocholesterol reductase                                                | 117   | 60062     | 6        | E                     |
| IPI00023919   | PSMC5       | 26S protease regulatory subunit 8                                              | 343   | 45597     | 20       | N                     |
| IPI00011603   | PSMD3       | 26S proteasome non-ATPase regulatory subunit 3                                 | 248   | 60939     | 17       | C                     |
| IPI00019927   | PSMD7       | 26S proteasome non-ATPase regulatory subunit 7                                 | 283   | 37002     | 11       |                       |
| IPI00017726   | HSD17B10    | 3-hydroxyacyl-CoA dehydrogenase type-2                                         | 756   | 26906     | 25       | M/E                   |
| IPI00001539   | ACAA2       | 3-ketoacyl-CoA thiolase, mitochondrial                                         | 183   | 41898     | 12       | M                     |
| IPI00012828   | ACAA1       | 3-ketoacyl-CoA thiolase, peroxisomal                                           | 271   | 44264     | 13       |                       |
| IPI00017448   | RPS21       | 40S ribosomal protein S21                                                      | 301   | 9106      | 24       | R/C                   |
| IPI00011253   | RPS3        | 40S ribosomal protein S3                                                       | 462   | 26671     | 26       | R/C                   |
| IPI00021840   | RPS6        | 40S ribosomal protein S6                                                       | 109   | 28663     | 8        | R/N/C                 |
| IPI00413108   | RPSA        | 40S ribosomal protein SA                                                       | 266   | 33293     | 9        | R/C                   |
| IPI00419919   | RPL29       | 60S ribosomal protein L29                                                      | 96    | 17741     | 5        | R/C                   |
| IPI00215790   | RPL38       | 60S ribosomal protein L38                                                      | 230   | 8213      | 9        | R/C                   |
| IPI00003918   | RPL4        | 60S ribosomal protein L4                                                       | 257   | 47667     | 11       | R/C                   |
| IPI00790342   | RPL6        | 60S ribosomal protein L6                                                       | 402   | 32871     | 34       | R/C                   |
| IPI00012772   | RPL8        | 60S ribosomal protein L8                                                       | 108   | 28007     | 6        | R/C                   |
| IPI00030363   | ACAT1       | Acetyl-CoA acetyltransferase, mitochondrial                                    | 301   | 45171     | 12       | M                     |
| IPI00017855   | ACO2        | Aconitate hydratase, mitochondrial                                             | 433   | 85372     | 27       | M                     |
| IPI00028031   | ACADVL      | Acyl-CoA dehydrogenase, mitochondrial                                          | 366   | 75162     | 16       | M                     |
| IPI00644771   | ACSM2A      | Acyl-coenzyme A synthetase ACSM2A, mitochondrial                               | 156   | 64182     | 10       | M                     |
| IPI00329444   | ACSM2B      | Acyl-coenzyme A synthetase ACSM2B, mitochondrial                               | 445   | 64230     | 18       | M                     |
| IPI00473031   | ADH1B       | Alcohol dehydrogenase 1B                                                       | 394   | 39829     | 24       | C                     |
| IPI00029715   | AOX1        | Aldehyde oxidase                                                               | 358   | 147822    | 31       |                       |
| IPI00105407   | AKR1B10     | Aldo-keto reductase family 1 member B10                                        | 344   | 35998     | 19       |                       |
| IPI00291483   | AKR1C3      | Aldo-keto reductase family 1 member C3                                         | 500   | 36821     | 19       |                       |
| IPI00221234   | ALDH7A1     | Alpha-aminoacidic semialdehyde dehydrogenase                                   | 321   | 58450     | 22       | M                     |
| IPI00008483   | MAOA        | Amine oxidase [flavin-containing] A                                            | 503   | 59644     | 28       | M                     |
| IPI00793199   | ANXA4       | Annexin A4                                                                     | 329   | 36062     | 13       |                       |
| IPI00002459   | ANXA6       | Annexin A6 isoform 2                                                           | 488   | 75229     | 26       |                       |
| IPI00220007   | APOL2       | Apolipoprotein-L2                                                              | 141   | 49735     | 5        |                       |
| IPI00554742   | API5        | Apoptosis inhibitor 5                                                          | 121   | 56735     | 4        |                       |
| IPI00038356   | ARG1        | Arginase-1                                                                     | 38    | 25340     | 1        |                       |
| IPI00220267   | ASL         | Argininosuccinate lyase                                                        | 279   | 51625     | 18       |                       |
| IPI00550523   | ATL3        | Atlastin-3                                                                     | 118   | 60503     | 8        | E                     |
| IPI00218200   | BCAP31      | B-cell receptor-associated protein 31                                          | 113   | 27974     | 10       | E/C                   |
| IPI00219575   | BLMH        | Bleomycin hydrolase                                                            | 34    | 52528     | 1        |                       |
| IPI00218342   | MTHFD1      | C-1-tetrahydrofolate synthase, cytoplasmic                                     | 278   | 101495    | 16       | M                     |
| IPI00218695   | CALD1       | Caldesmon                                                                      | 363   | 64218     | 22       | CS                    |
| IPI00011062   | CPS1        | Carbamoyl-phosphate synthase [ammonia], mitochondrial                          | 553   | 164835    | 41       | M                     |
| IPI00295386   | CBR1        | Carbonyl reductase [NADPH] 1                                                   | 231   | 30356     | 10       |                       |
| IPI00383046   | CMBL        | Carboxymethylglutaminyl-CoA synthetase homolog                                 | 225   | 28030     | 12       |                       |
| IPI00015833   | CHCHD3      | Coiled-coil-helix-coiled-coil-helix domain-containing protein 3, mitochondrial | 228   | 26136     | 13       | M                     |
| IPI00021828   | CSTB        | Cystatin-B                                                                     | 162   | 11133     | 7        | N                     |
| IPI00442073   | CSRP1       | Cysteine and glycine-rich protein 1                                            | 275   | 20554     | 14       |                       |
| IPI00305383   | UQCRC2      | Cytochrome b-c1 complex subunit 2, mitochondrial                               | 749   | 48413     | 22       | M                     |
| IPI00218144   | COX17       | Cytochrome c oxidase copper chaperone                                          | 85    | 6910      | 5        | M                     |
| IPI00006579   | COX4I1      | Cytochrome c oxidase subunit 4 isoform 1, mitochondrial                        | 265   | 19564     | 16       | M                     |
| IPI00021785   | COX5B       | Cytochrome c oxidase subunit 5B, mitochondrial                                 | 61    | 13687     | 6        | M                     |
| IPI00465138   | CYP3A4      | Cytochrome P450 3A4                                                            | 179   | 57306     | 10       | E                     |
| IPI00011200   | PHGDH       | D-3-phosphoglycerate dehydrogenase                                             | 134   | 56614     | 5        |                       |
| IPI00106913   | DHRS4       | Dehydrogenase/reductase SDR family member 4                                    | 130   | 29518     | 10       | M                     |
| IPI00006957   | DHRS7       | Dehydrogenase/reductase SDR family member 7                                    | 167   | 38274     | 9        |                       |
| IPI00011416   | ECH1        | Delta(3,5)-Delta(2,4)-dienoyl-CoA isomerase, mitochondrial                     | 325   | 35793     | 14       | M                     |
| IPI00014439   | QDPR        | Dihydropteridine reductase                                                     | 351   | 25773     | 12       |                       |
| IPI00257508   | DPYSL2      | Dihydropyrimidinase-related protein 2                                          | 148   | 62255     | 7        | M/CS                  |
| IPI00002506   | ALG5        | Dolichyl-phosphate beta-glucosyltransferase                                    | 81    | 36922     | 2        | E                     |
| IPI00329536   | EEA1        | Early endosome antigen 1                                                       | 381   | 162367    | 55       | C                     |
| IPI00004902   | ETFB        | Electron transfer flavoprotein subunit beta                                    | 692   | 27826     | 35       | M                     |
| IPI00256376   | ECHDC3      | Enoyl-CoA hydratase domain-containing protein 3,                               | 329   | 32673     | 15       | M                     |
| IPI00009896   | EPHX1       | Epoxide hydrolase 1                                                            | 223   | 52915     | 11       | E                     |
| IPI00022744   | CSE1L       | Exportin-2                                                                     | 88    | 110346    | 3        |                       |
| IPI00010290   | FABP1       | FABP1 protein (Fragment)                                                       | 465   | 15083     | 25       | C                     |
| IPI00375441   | FUBP1       | Far upstream element-binding protein 1                                         | 213   | 67518     | 17       | N                     |
| IPI00007797   | FABP5       | Fatty acid-binding protein, epidermal                                          | 41    | 15155     | 1        |                       |
| IPI00375676   | FTL         | Ferritin                                                                       | 285   | 21283     | 10       | R/C                   |
| IPI00021891   | FGG         | Fibrinogen gamma chain                                                         | 149   | 51479     | 11       |                       |
| IPI00218407   | ALDOB       | Fructose-bisphosphate aldolase B                                               | 502   | 39448     | 27       | CS/C                  |
| IPI00019383   | GALK1       | Galactokinase                                                                  | 351   | 45329     | 13       | C                     |
| IPI00031583   | USO1        | General vesicular transport factor p115                                        | 301   | 109127    | 12       | C                     |
| IPI00027497   | GPI         | Glucose-6-phosphate isomerase                                                  | 482   | 63107     | 22       |                       |
| IPI00026154   | PRKCSH      | Glucosidase 2 subunit beta                                                     | 99    | 60096     | 4        | E                     |
| IPI00216279   | GATM        | Glycine amidinotransferase, mitochondrial                                      | 697   | 44854     | 47       | M                     |
| IPI00004962   | GOLIM4      | Golgi integral membrane protein 4                                              | 197   | 81831     | 8        |                       |
| IPI00002149   | SAR1B       | GTP-binding protein SAR1b                                                      | 162   | 22396     | 8        | E                     |
| IPI00641737   | HP          | Haptoglobin                                                                    | 77    | 46693     | 3        |                       |
| IPI00215965   | HNRNPA1     | Heterogeneous nuclear ribonucleoprotein A1                                     | 131   | 38723     | 12       | N                     |
| IPI00216049   | HNRNPK      | Heterogeneous nuclear ribonucleoprotein K                                      | 276   | 50944     | 14       | N                     |
| IPI00006934   | HAO1        | Hydroxyacid oxidase 1                                                          | 323   | 40898     | 20       |                       |
| IPI00217561   | ITGB1       | Integrin beta-1                                                                | 198   | 91560     | 12       |                       |
| IPI00027223   | IDH1        | Isocitrate dehydrogenase [NADP] cytoplasmic                                    | 131   | 46630     | 3        | C                     |
| IPI00011107   | IDH2        | Isocitrate dehydrogenase [NADP], mitochondrial                                 | 256   | 50877     | 14       | M                     |
| IPI00021405   | LMNA        | Lamin-A/C                                                                      | 100   | 74095     | 2        | CS                    |
| IPI00783271   | LRPPRC      | Leucine-rich PPR motif-containing protein, mitochondrial                       | 203   | 157805    | 22       | M/CS                  |
| IPI00012728   | ACSL1       | Long-chain-fatty-acid-CoA ligase 1                                             | 282   | 77893     | 15       | M/E/C                 |
| IPI00291006   | MDH2        | Malate dehydrogenase, mitochondrial                                            | 184   | 35481     | 9        | C                     |
| IPI00005040   | ACADM       | Medium-chain specific acyl-CoA dehydrogenase, mitochondrial                    | 149   | 46559     | 10       | M                     |
| IPI00168565   | CNNM3       | Metal transporter CNNM3                                                        | 39    | 76072     | 1        |                       |
| IPI00784044   | MCCC2       | Methylcrotonoyl-CoA carboxylase beta chain, mitochondrial                      | 528   | 61294     | 24       | M                     |

|             |          |                                                                          |     |        |    |        |
|-------------|----------|--------------------------------------------------------------------------|-----|--------|----|--------|
| IPI00024990 | ALDH6A1  | Methylmalonate-semialdehyde dehydrogenase [acylating], mitochondrial     | 415 | 57803  | 21 | M      |
| IPI00024934 | MUT      | Methylmalonyl-CoA mutase, mitochondrial                                  | 244 | 83068  | 9  | M      |
| IPI00022300 | METTL7A  | Methyltransferase-like protein 7A                                        | 63  | 28301  | 4  |        |
| IPI00003842 | MAP2     | Microtubule-associated protein 2                                         | 73  | 199404 | 5  | CS     |
| IPI00043863 | MAP4     | Microtubule-associated protein 4                                         | 34  | 88222  | 2  | CS     |
| IPI00003833 | MTCH2    | Mitochondrial carrier homolog 2                                          | 207 | 33309  | 12 | M      |
| IPI00544469 | JIMT     | Mitochondrial inner membrane protein                                     | 467 | 82574  | 27 | M      |
| IPI00335168 | MYL6     | Myosin light polypeptide 6                                               | 354 | 16919  | 16 | CS     |
| IPI00219301 | MARCKS   | Myristoylated alanine-rich C-kinase substrate                            | 33  | 31536  | 1  | CS     |
| IPI00328415 | CYB5R3   | NADH-cytochrome b5 reductase 3                                           | 163 | 34213  | 11 | M/E/C  |
| IPI00021812 | AHNAK    | Neuroblast differentiation-associated protein AHNAK                      | 112 | 628699 | 2  |        |
| IPI00026105 | SCP2     | Non-specific lipid-transfer protein                                      | 300 | 58956  | 15 | M      |
| IPI00010414 | PDLIM1   | PDZ and LIM domain protein 1                                             | 78  | 36049  | 7  | CS     |
| IPI00646304 | PP1B     | Peptidyl-prolyl cis-trans isomerase B                                    | 544 | 23728  | 32 | E      |
| IPI00218775 | FKBP5    | Peptidyl-prolyl cis-trans isomerase FKBP5                                | 893 | 51180  | 45 |        |
| IPI00006658 | PIN4     | Peptidyl-prolyl cis-trans isomerase NIMA-interacting 4                   | 118 | 16598  | 5  | M/CS/N |
| IPI00220301 | PRDX6    | Peroxiredoxin-6                                                          | 289 | 25019  | 16 | C      |
| IPI00216164 | EHHADH   | Peroxisomal bifunctional enzyme                                          | 392 | 79445  | 25 | M      |
| IPI00219446 | PEBP1    | Phosphatidylethanolamine-binding protein 1                               | 105 | 21044  | 2  | M/E/CS |
| IPI00797038 | PCK2     | Phosphoenolpyruvate carboxykinase [GTP], mitochondrial                   | 143 | 70685  | 12 | M      |
| IPI00219526 | PGM1     | Phosphoglucomutase-1                                                     | 272 | 61411  | 9  | C      |
| IPI00329600 | SCCPDH   | Probable saccharopine dehydrogenase                                      | 224 | 47121  | 8  |        |
| IPI00003964 | USP9X    | probable ubiquitin carboxyl-terminal hydrolase FAF-X isoform 4           | 31  | 290278 | 1  |        |
| IPI00017334 | PHB      | Prohibitin                                                               | 427 | 29786  | 12 | M      |
| IPI00744115 | PCCA     | propionyl-CoA carboxylase alpha chain, mitochondrial isoform a precursor | 453 | 80008  | 22 | M      |
| IPI00292657 | PTGR1    | Prostaglandin reductase 1                                                | 472 | 35847  | 23 |        |
| IPI00000783 | PSMB8    | Proteasome subunit beta type-8                                           | 247 | 30335  | 9  |        |
| IPI00026530 | LMAN1    | Protein ERGIC-53                                                         | 159 | 57513  | 9  | E      |
| IPI00328715 | MTDH     | Protein LYRIC                                                            | 48  | 63799  | 3  | E/N    |
| IPI00007047 | S100A8   | Protein S100-A8                                                          | 61  | 10828  | 4  |        |
| IPI00939362 | S100A9   | Putative uncharacterized protein S100A9                                  | 38  | 9377   | 2  | N      |
| IPI00000792 | CRYZ     | Quinone oxidoreductase                                                   | 190 | 35185  | 13 |        |
| IPI00299048 | IQGAP2   | Ras GTPase-activating-like protein IQGAP2                                | 228 | 180465 | 8  | CS     |
| IPI00020436 | RAB11B   | Ras-related protein Rab-11B                                              | 183 | 24473  | 6  |        |
| IPI00291928 | RAB14    | Ras-related protein Rab-14                                               | 123 | 23882  | 7  | E/C    |
| IPI00031169 | RAB2A    | Ras-related protein Rab-2A                                               | 193 | 23531  | 4  | E      |
| IPI00005038 | HRSP12   | Ribonuclease UK114                                                       | 81  | 14485  | 2  |        |
| IPI00555744 | RPL14    | Ribosomal protein L14 variant                                            | 257 | 23772  | 9  | R/C    |
| IPI00514399 | RPS27    | Ribosomal protein S27                                                    | 66  | 7352   | 5  | R/C    |
| IPI00215743 | RRBP1    | Ribosome-binding protein 1                                               | 325 | 152381 | 18 | E/R    |
| IPI00012303 | SELENBP1 | Selenium binding protein 1                                               | 244 | 56830  | 13 | C      |
| IPI00014177 | SEPT_2   | Septin-2                                                                 | 500 | 41461  | 27 | CS/N   |
| IPI00002519 | SHMT1    | Serine hydroxymethyltransferase, cytosolic                               | 226 | 53049  | 14 | M/C    |
| IPI00002520 | SHMT2    | Serine hydroxymethyltransferase, mitochondrial                           | 210 | 55958  | 10 | M      |
| IPI00022463 | TF       | Serotransferrin                                                          | 335 | 77000  | 28 |        |
| IPI00745872 | ALB      | Serum albumin                                                            | 443 | 69321  | 20 |        |
| IPI00004267 | SIGMAR1  | Sigma non-opioid intracellular receptor 1                                | 90  | 21469  | 4  | E      |
| IPI00303063 | PDS5A    | Sister chromatid cohesion protein PDS5 homolog A                         | 143 | 146575 | 4  |        |
| IPI00003419 | C11orf58 | Small acidic protein                                                     | 82  | 20320  | 1  |        |
| IPI00006482 | ATP1A1   | Sodium/potassium-transporting ATPase subunit alpha-1                     | 189 | 112824 | 10 |        |
| IPI00029601 | CTTN     | Src substrate cortactin                                                  | 229 | 61549  | 11 | CS     |
| IPI00013894 | STIP1    | Stress-induced-phosphoprotein 1                                          | 327 | 62599  | 27 |        |
| IPI00217232 | SUCLA2   | Succinyl-CoA ligase [ADP-forming] subunit beta, mitochondrial            | 157 | 48009  | 11 | M      |
| IPI00218733 | SOD1     | Superoxide dismutase [Cu-Zn]                                             | 108 | 15926  | 7  | M/C    |
| IPI00297779 | CCT2     | T-complex protein 1 subunit beta                                         | 224 | 57452  | 22 | N/C    |
| IPI00784090 | CCT8     | T-complex protein 1 subunit theta                                        | 250 | 59583  | 13 | C      |
| IPI00027626 | CCT6A    | T-complex protein 1 subunit zeta                                         | 314 | 57988  | 24 | C      |
| IPI00216293 | TST      | Thiosulfate sulfurtransferase                                            | 474 | 33408  | 22 | M      |
| IPI00018768 | TSN      | Translin                                                                 | 206 | 26167  | 11 |        |
| IPI00022793 | HADHB    | Trifunctional enzyme subunit beta, mitochondrial                         | 314 | 51262  | 21 | M      |
| IPI00027107 | TUFM     | Tu translation elongation factor, mitochondrial precursor                | 512 | 49843  | 29 | M      |
| IPI00550917 | TWF2     | Twinfilin-2                                                              | 119 | 39523  | 8  |        |
| IPI00451965 | UGT1A6   | UDP-glucuronosyltransferase 1-6                                          | 149 | 60711  | 8  | E      |
| IPI00301491 | UGT2B4   | UDP-glucuronosyltransferase 2B4                                          | 59  | 60473  | 8  | E      |
| IPI00006211 | VAPB     | Vesicle-associated membrane protein-associated protein B/C               | 130 | 27211  | 7  | E      |
| IPI00216308 | VDAC1    | Voltage-dependent anion-selective channel protein 1                      | 394 | 30754  | 13 | M      |
| IPI00024145 | VDAC2    | Voltage-dependent anion-selective channel protein 2                      | 121 | 30393  | 3  | M      |
| IPI00257882 | PEPD     | Xaa-Pro dipeptidase                                                      | 322 | 54513  | 14 |        |

Cellular components: M: mitochondrion, E: endoplasmic reticulum, CS: cytoskeleton, R: ribosome and C: cytosol
